# Supplementary figures and images for: Nocturnal nitrogen oxides at a rural mountain-site in south-western Germany
Source: Copernicus journal article supplement (doi:10.5194/acp-10-2795-2010), 2010-03-25

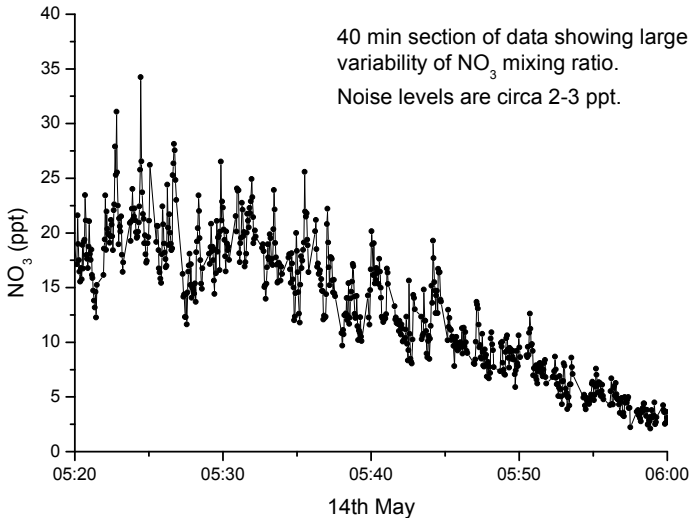

Supplement: Supplementary file 1 [file acp-10-2795-2010-supplement.pdf]
